# Supplementary material for: Chronic Drug-Induced Liver Injury: Updates and Future Challenges
Source: PubMed Central journal article supplement (PMC7982586; doi:10.3389/fphar.2021.627133), 2021-03-08
Supplement: datasheet1.pdf [file datasheet1.pdf]

**Figure 1** Schematic diagram of biochemical index changes in patients with chronic DILI

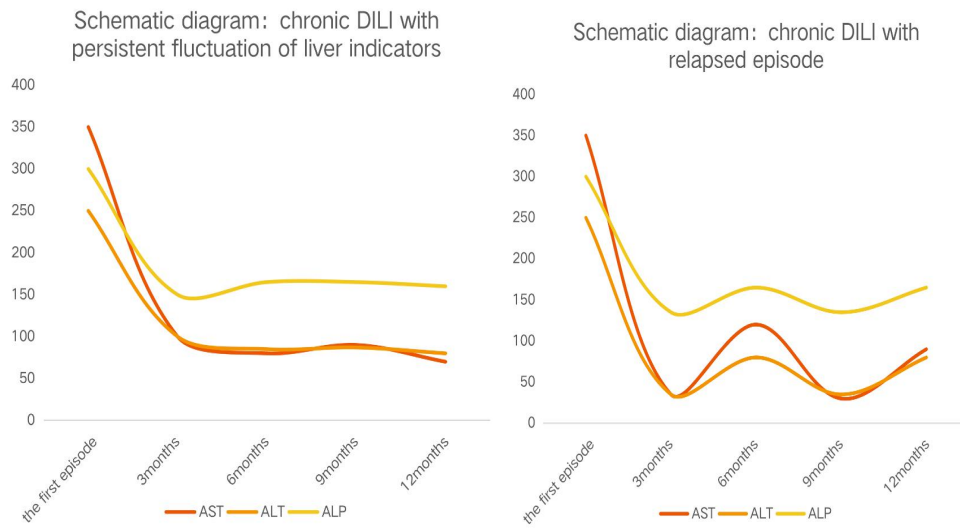

Abbreviations: AST: aspartate transaminase; ALT: alanine aminotransferase; ALP: alkaline phosphatase
